# Supplementary material for: UEx-L-Eddies: Decadal and global long-lived mesoscale eddy trajectories with coincident air-sea CO 2 fluxes and biogeochemical conditions
Source: Copernicus journal article supplement (doi:10.5194/essd-2025-463), 2025-08-14
Supplement: Supplementary file 1 [file essd-2025-463-supplement.pdf]

# UEx-L-Eddies: Decadal and global long-lived mesoscale eddy trajectories with coincident air-sea CO<sub>2</sub> fluxes and biogeochemical conditions

Daniel J. Ford<sup>1</sup>, Jamie D. Shutler<sup>1</sup>, Katy L. Sheen<sup>1</sup>, Gavin H. Tilstone<sup>2</sup>, and Vassilis Kitidis<sup>2</sup>

5 <sup>1</sup> Centre for Geography and Environmental Sciences (CGES), University of Exeter, Penryn, UK.

<sup>2</sup> Plymouth Marine Laboratory, Plymouth, UK

Correspondence to: Daniel J. Ford ([d.ford@exeter.ac.uk](mailto:d.ford@exeter.ac.uk))

## Supporting Information

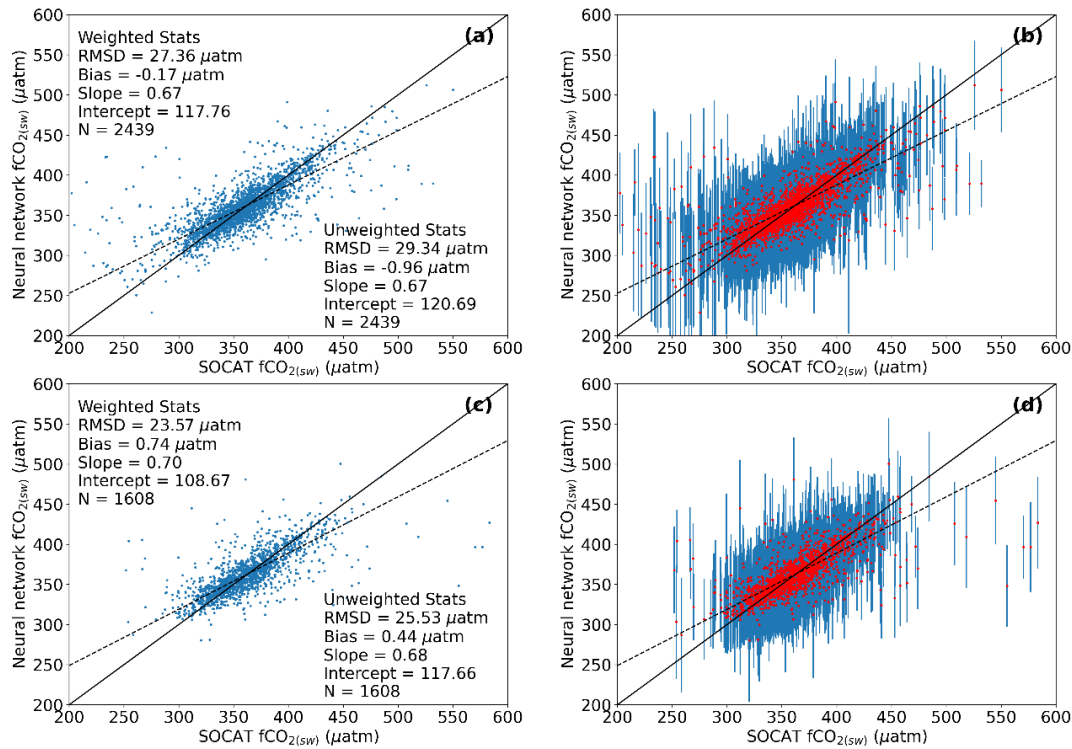

10 **Figure S1: (a) Comparison of the neural network  $f\text{CO}_2(\text{sw})$  (with chl-a added as a predictor) to in situ SOCAT observations within anticyclonic eddies. Solid black line is the 1:1. Dashed line is the Type II linear regression. In text statistics are root mean square difference (RMSD), bias, slope and intercept of a Type II linear regression and number of matches (N). (b) same as (a) but showing the uncertainty on the neural network  $f\text{CO}_2(\text{sw})$  (2 sigma; 95% confidence) as errorbars for anticyclonic eddies. (c and d) same as (a and b) for cyclonic eddies.**
